# Supplementary material for: Sensory nerve niche regulates mesenchymal stem cell homeostasis via FGF/mTOR/autophagy axis
Source: PubMed Central journal article supplement (PMC9859800; doi:10.1038/s41467-023-35977-4), 2023-01-20
Supplement: 41467_2023_35977_MOESM3_ESM.pdf [file 41467_2023_35977_MOESM3_ESM.pdf]

## **Description of Additional Supplementary Files**

**Supplementary Movie 1:** 3D image of nerves in the incisor with tissue clearing.
