# Supplementary material for: Sensory nerve niche regulates mesenchymal stem cell homeostasis via FGF/mTOR/autophagy axis
Source: Nat Commun. 2023 Jan 20;14:344. doi: 10.1038/s41467-023-35977-4 (PMC9859800; doi:10.1038/s41467-023-35977-4)
Supplement: Supplementary file 1 — Supplementary Information [file 41467_2023_35977_MOESM1_ESM.pdf]

Sensory nerve niche regulates mesenchymal stem cell homeostasis via  
FGF/mTOR/autophagy axis

This document includes:

**Supplementary Fig.1 to Supplementary Fig. 8**

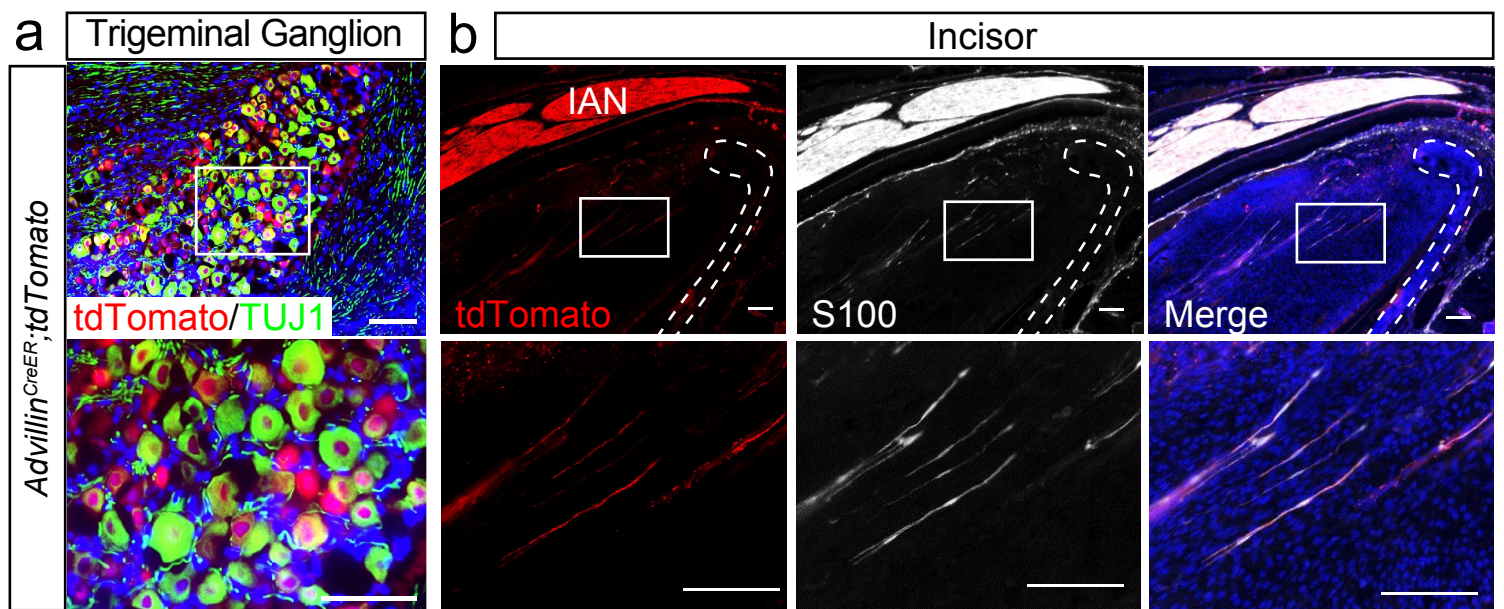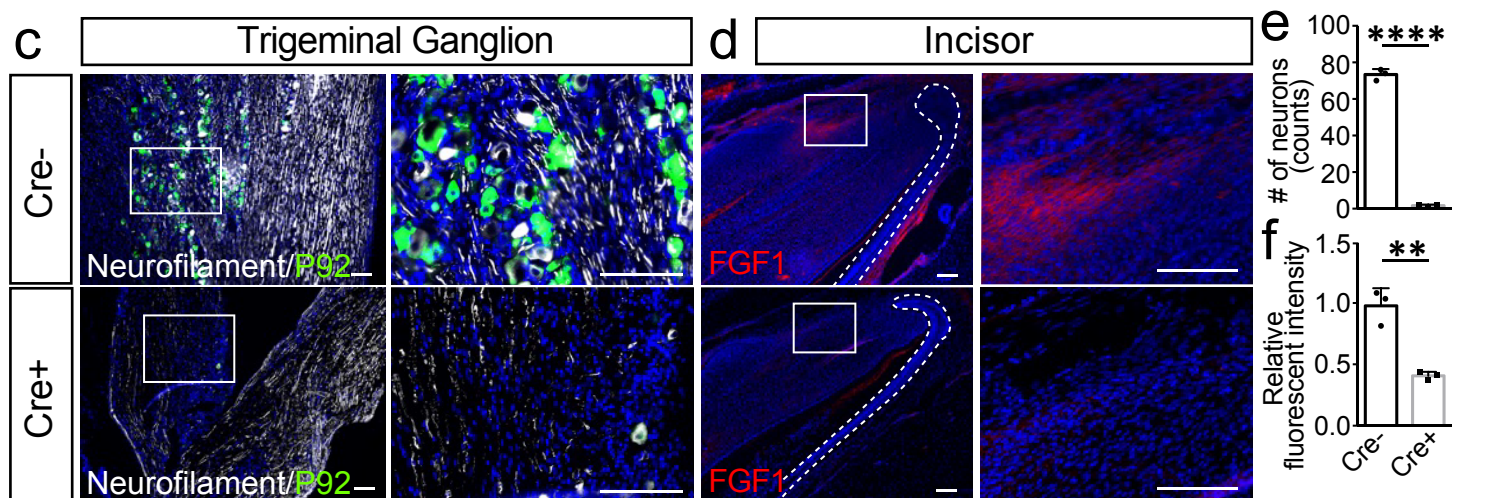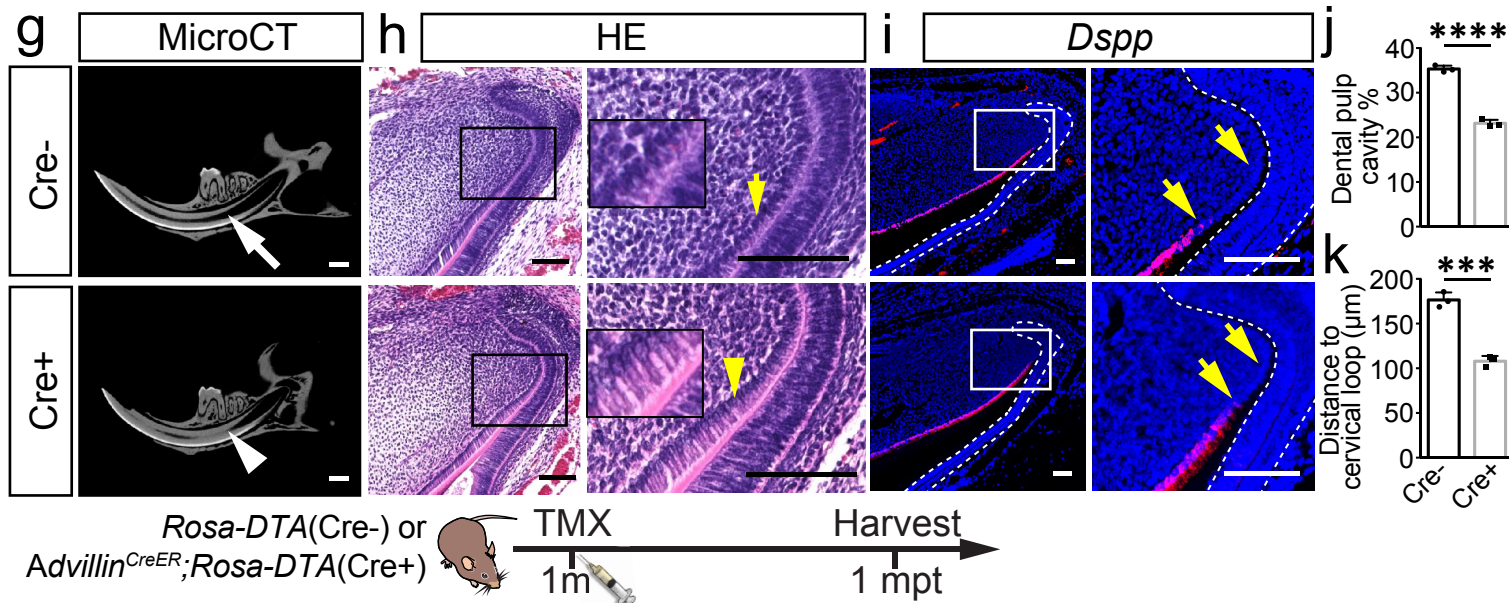

**Supplementary Fig. 1: Deletion of sensory nerve leads to abnormal dentin formation.**

**a** Colocalization of tdTomato and nerve marker TUJ1 in the trigeminal ganglion of *Advillin<sup>CreER</sup>;tdTomato* mice 7 days after induction. **b** *Advillin* targeted inferior alveolar nerve (IAN) and nerve fibers in the incisor of *Advillin<sup>CreER</sup>;tdTomato* mice. Expression of tdTomato in IAN and nerves in the incisor, and colocalized with nerve marker S100. **c** Sensory neurons stained with P92 in the trigeminal ganglion of control and *Advillin<sup>CreER</sup>;Rosa-DTA* mice one month after tamoxifen induction. **d** Expression of FGF1 decreased in the incisor one month after sensory nerve deletion. **e** Quantification of neuron numbers in trigeminal ganglion in control and *Advillin<sup>CreER</sup>;Rosa-DTA* mice.  $P < 0.0001$ . **f** Quantification of relative fluorescent intensity of FGF1 in control and mutant mice.  $P = 0.0026$ . **g** CT scanning of control and *Advillin<sup>CreER</sup>;Rosa-DTA* mice one month after tamoxifen induction. White arrow points to dental pulp cavity; white arrowhead points to narrowed pulp cavity. **h** Histological analysis of control and *Advillin<sup>CreER</sup>;Rosa-DTA* mice one month after induction. Yellow arrow points to pre-odontoblast; yellow arrowhead points to abnormal pre-odontoblast. **i** *Dspp* expression in control and mutant mice. Yellow arrow points to the distance between the bending point of the cervical loop and the initiation of odontoblast differentiation. **j** Quantification of dental pulp cavity percentage in control and mutant mice.  $P < 0.0001$ . **k** Quantification of distance of *Dspp*<sup>+</sup> cells to cervical loop in control and mutant mice.  $P = 0.0003$ . For **e**, **f**, **j** and **k**  $n = 3$ , each data point represents one animal, with unpaired Student's t-test performed. All data are expressed as the mean  $\pm$  SD. Source data are provided as a Source Data file. \*\* $P < 0.01$ , \*\*\*\* $P < 0.0001$ . Each experiment was repeated independently three times. White dotted line outlines cervical loop. Cre-: *Rosa-DTA*; Cre+: *Advillin<sup>CreER</sup>;Rosa-DTA*. Scale bars, **g** 1mm; others, 100 $\mu$ m.

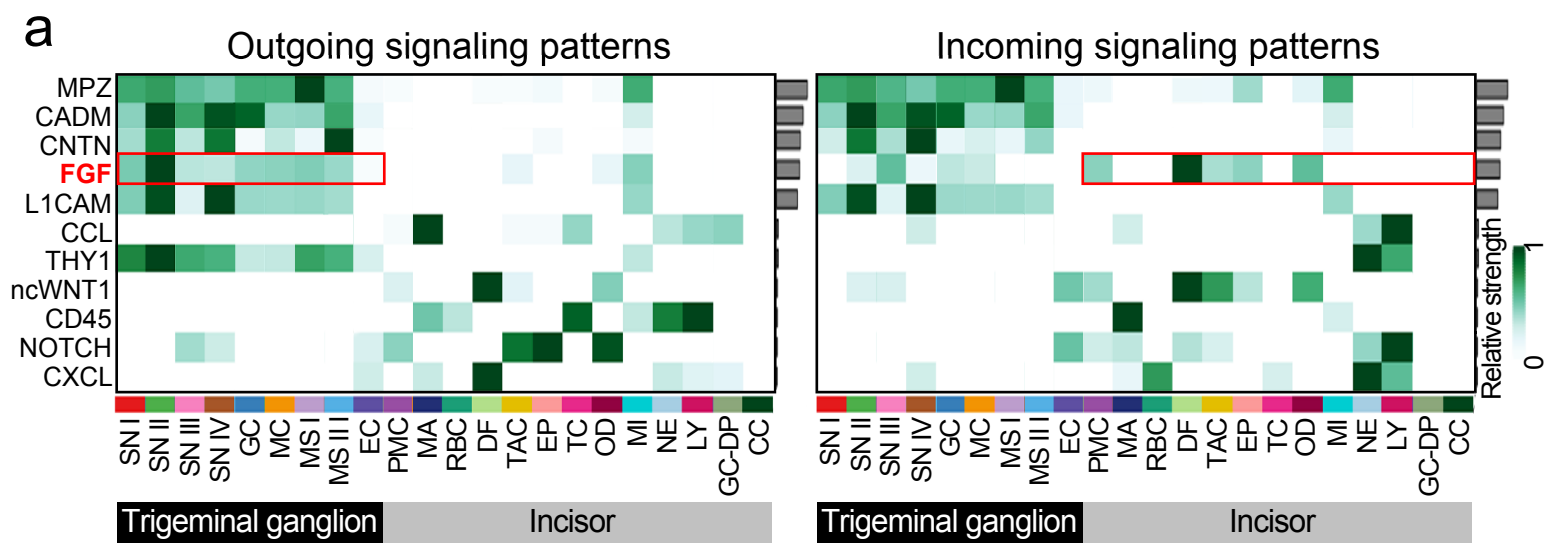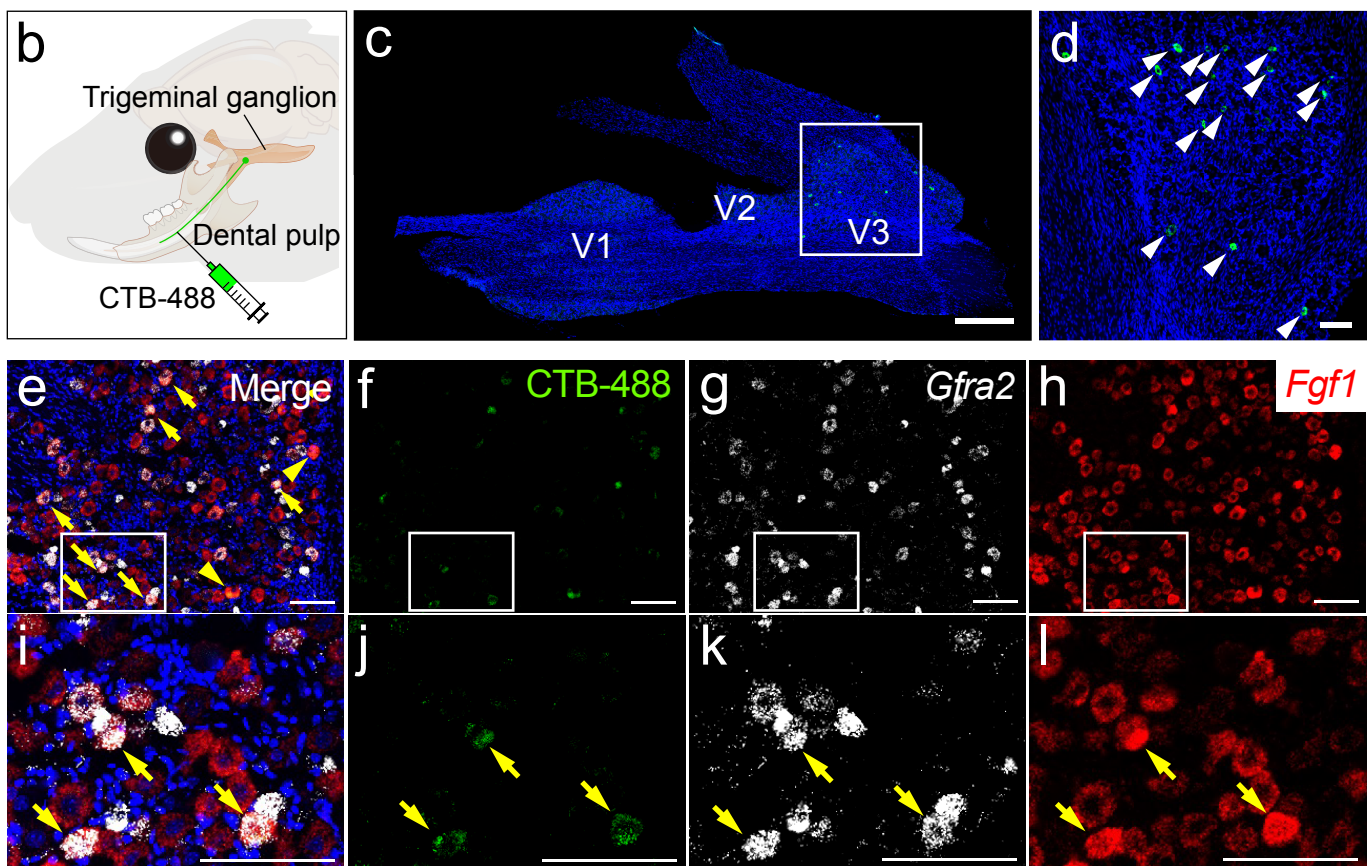

## Supplementary Fig. 2: FGF1 is an important ligand secreted from sensory neurons.

**a** Significant signaling pathways involved in the interaction between the trigeminal ganglion and incisor of an adult mouse. SNI-IV, sensory neuron type I-IV; GC, glia cell; PMC, proximal mesenchymal cell (MSC region); MC, meningeal cell; MS, myelinating Schwann cell; nMS, non-myelinating Schwann cell; MA, macrophage; RBC, red blood cell; DF, dental follicle cell; TAC, TA cell; TC, T cell; OD, odontoblast; MI, microglia; NE, neutrophil; LY, lymphocyte; EC, endothelial cell; GC-DP, glia cell in dental pulp; CC, cycling cell. **b** Schematic illustrating the retrograde fluorescent tracing. **c-d** Fluorescent cells in the trigeminal ganglion. CTB-488<sup>+</sup> neurons were exclusively detected in the V3 branch of the trigeminal nerve. V1, V2 and V3 indicate the three branches of the trigeminal nerve. White arrowheads point to CTB-488<sup>+</sup> neurons. **e-l** Mechanosensation neurons innervating incisor secrete FGF1. **e and i** Colocalization of CTB-488, *Gfra2* and *Fgf1* in V3 of trigeminal ganglion. **f and j** CTB-488<sup>+</sup> neurons in trigeminal ganglion. **g and k** Expression of *Gfra2* in trigeminal ganglion. **h and l** Expression of *Fgf1* in trigeminal ganglion. Yellow arrows indicate CTB-488<sup>+</sup>/*Gfra2*<sup>+</sup>/*Fgf1*<sup>+</sup> neurons; yellow arrowheads indicate CTB-488<sup>+</sup>/*Fgf1*<sup>+</sup> neurons. Scale bars, **c**, 500μm; others, 100μm.

**a**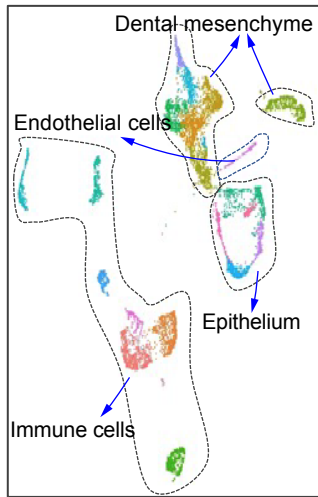**b**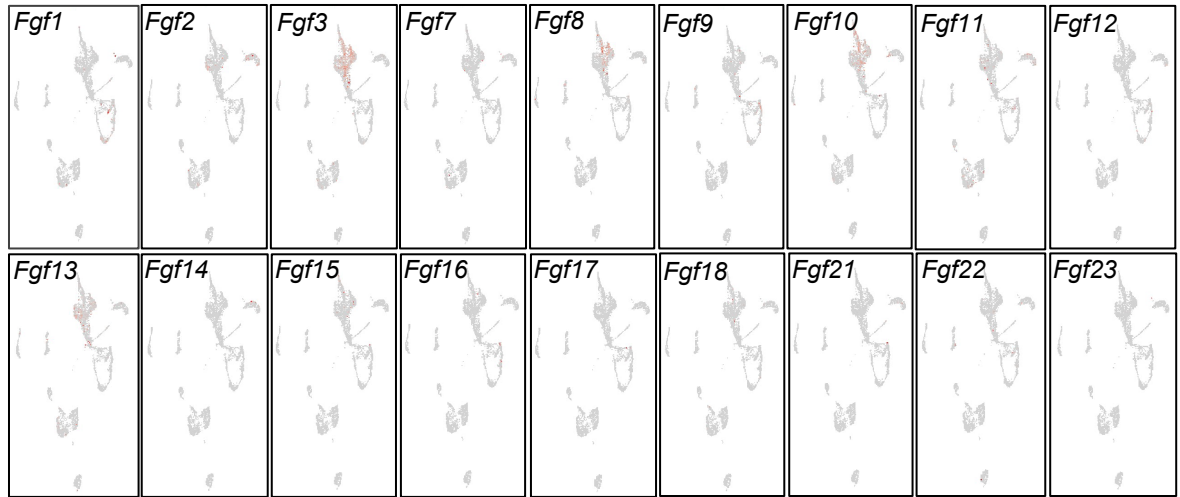**c**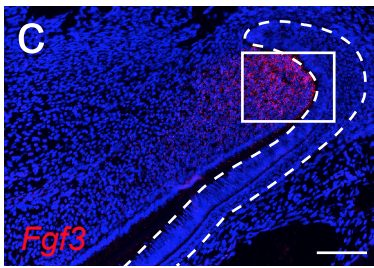**d**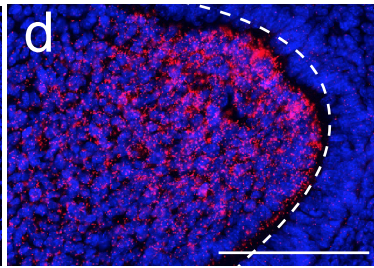**e**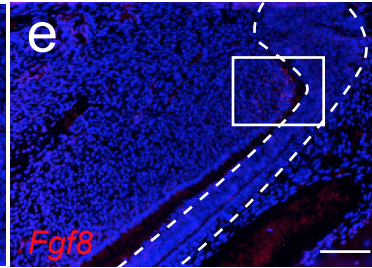**f**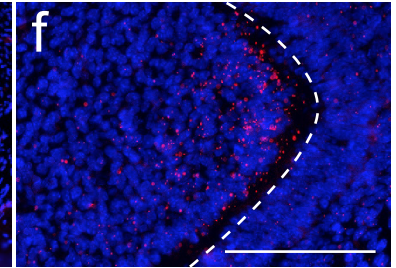**g**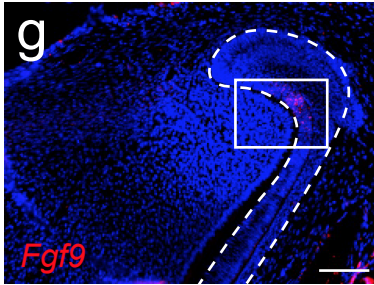**h**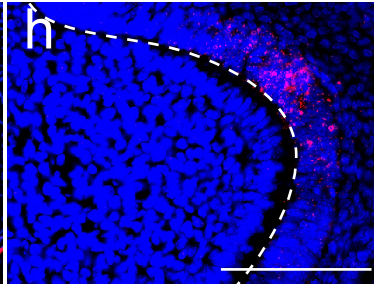**i**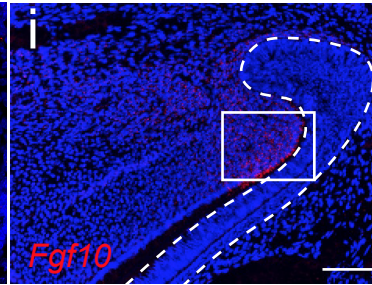**j**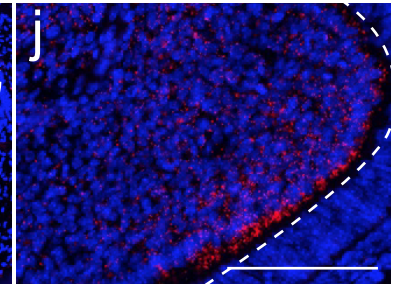

**Supplementary Fig. 3: FGF ligands in adult mouse incisor.**

**a-b** Feature plot of FGF ligands in adult mouse incisor. **c-d** RNAscope staining of *Fgf3* in the incisor. **e-f** RNAscope staining of *Fgf8* in the incisor. **g-h** Expression of *Fgf9* in the incisor. **i-j** Expression of *Fgf10* in the incisor. White dotted line outlines cervical loop. Scale bars, 100µm.

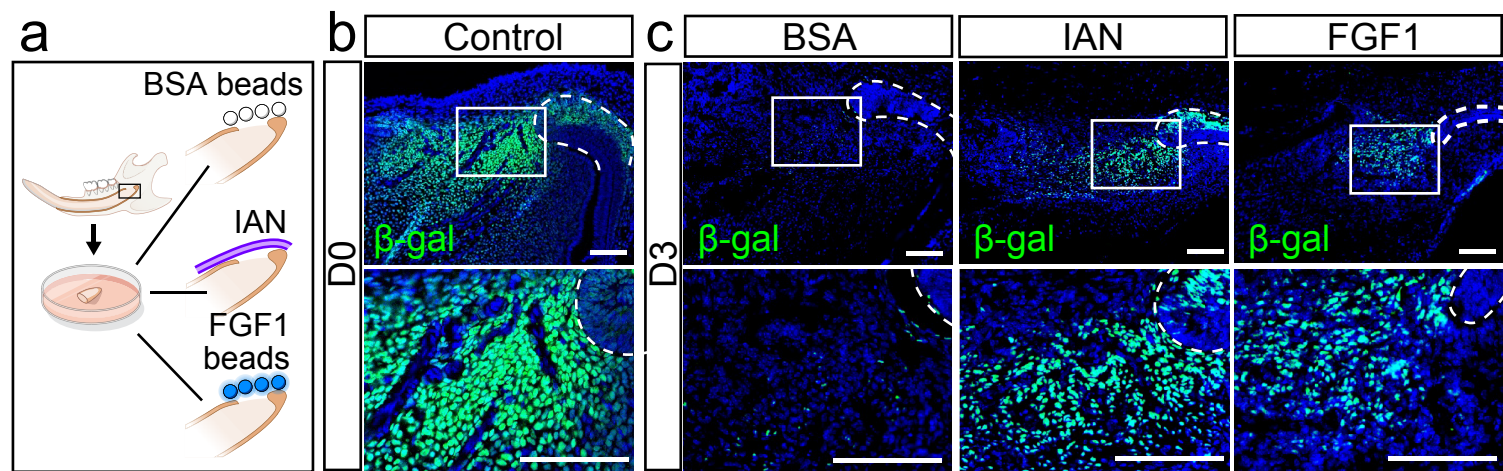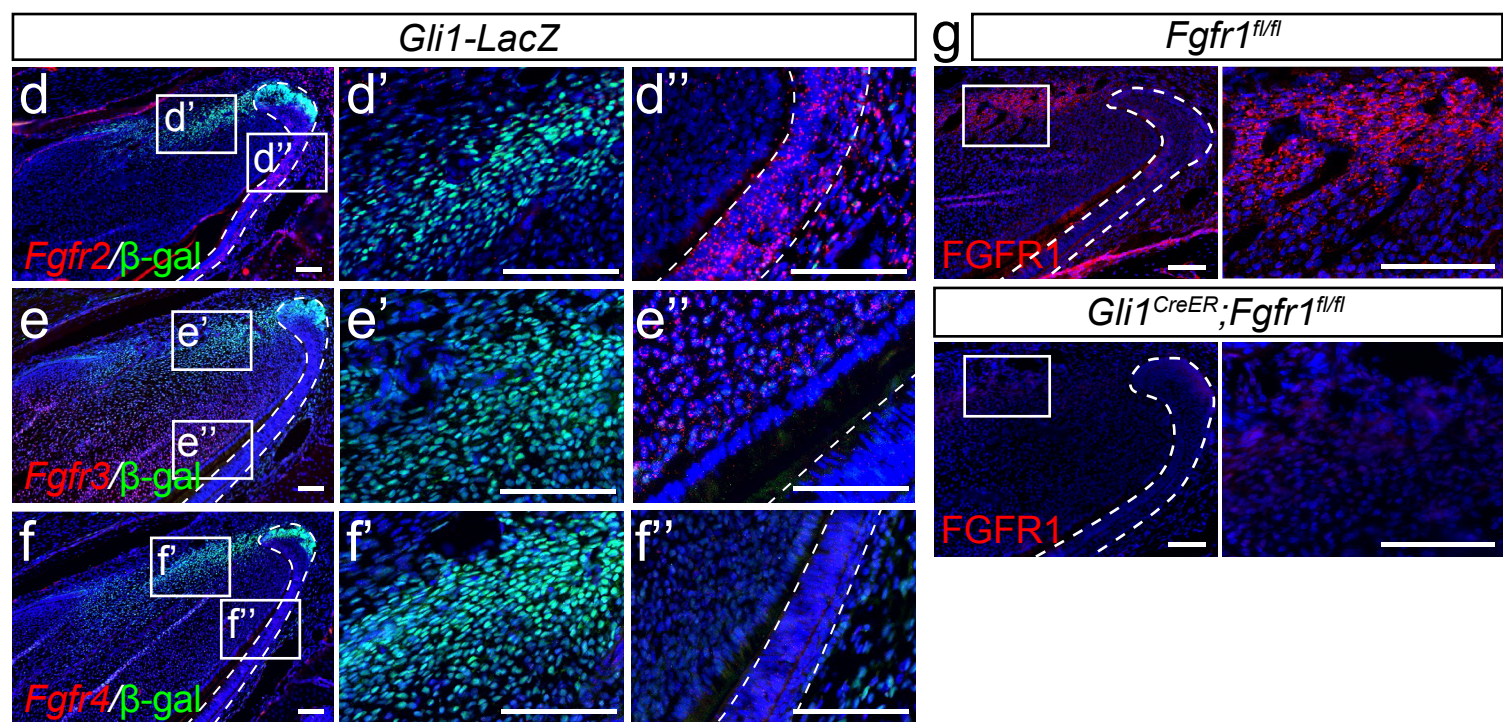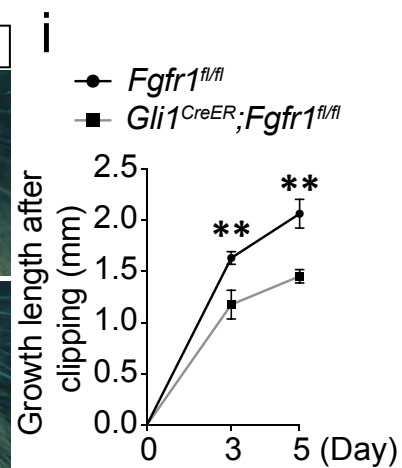

**Supplementary Fig. 4: FGF1 secreted from sensory nerves directly acts on MSCs via FGFR1.**

**a-c** FGF1 is crucial for MSC maintenance. **a** Schematic of the incisor explant culture. The proximal ends of *Gli1-LacZ* mouse incisors were cultured with BSA beads, IAN and recombinant FGF1 beads respectively. **b** Expression of *Gli1*<sup>+</sup> cells in the proximal end of the incisor. **c** *Gli1*<sup>+</sup> cells labeled with β-gal in incisor explant with BSA beads, IAN surrounding the proximal end or recombinant FGF1 beads cultured for 3 days respectively.

**d-f** Expression of FGFRs in the incisor. **d** Expression patterns of *Fgfr2* and β-gal in the incisors of *Gli1-LacZ* mice. **e** *Fgfr3* is expressed in the sub-odontoblast layer and in partial pulp cells, but is barely detectable in the proximal end of the incisor. **f** *Fgfr4* expression is undetectable in the incisor.

**g** FGFR1 was deleted in *Gli1<sup>CreER</sup>;Fgfr1<sup>fl/fl</sup>* mice. The expression of FGFR1 is shown in control and *Gli1<sup>CreER</sup>;Fgfr1<sup>fl/fl</sup>* mice.

**h** Tissue repair is impaired after FGF signaling is deleted in MSCs. The incisor was clipped and the subsequent injury repair was observed in control and *Gli1<sup>CreER</sup>;Fgfr1<sup>fl/fl</sup>* mice on D3 and D5 after clipping. The amount of incisor growth in control and *Gli1<sup>CreER</sup>;Fgfr1<sup>fl/fl</sup>* mice was analyzed on D3 and D5 after clipping. D3: P=0.0069; D5: P=0.0024. N=3, each data point represents one animal, with unpaired Student's t-test performed. All data are expressed as the mean±SD. Source data are provided as a Source Data file. \*\*P<0.01, \*\*\*\*P<0.0001. Each experiment was repeated independently three times. White dotted line shows the cervical loop. Scale bars, **h** 1mm; others, 100μm.

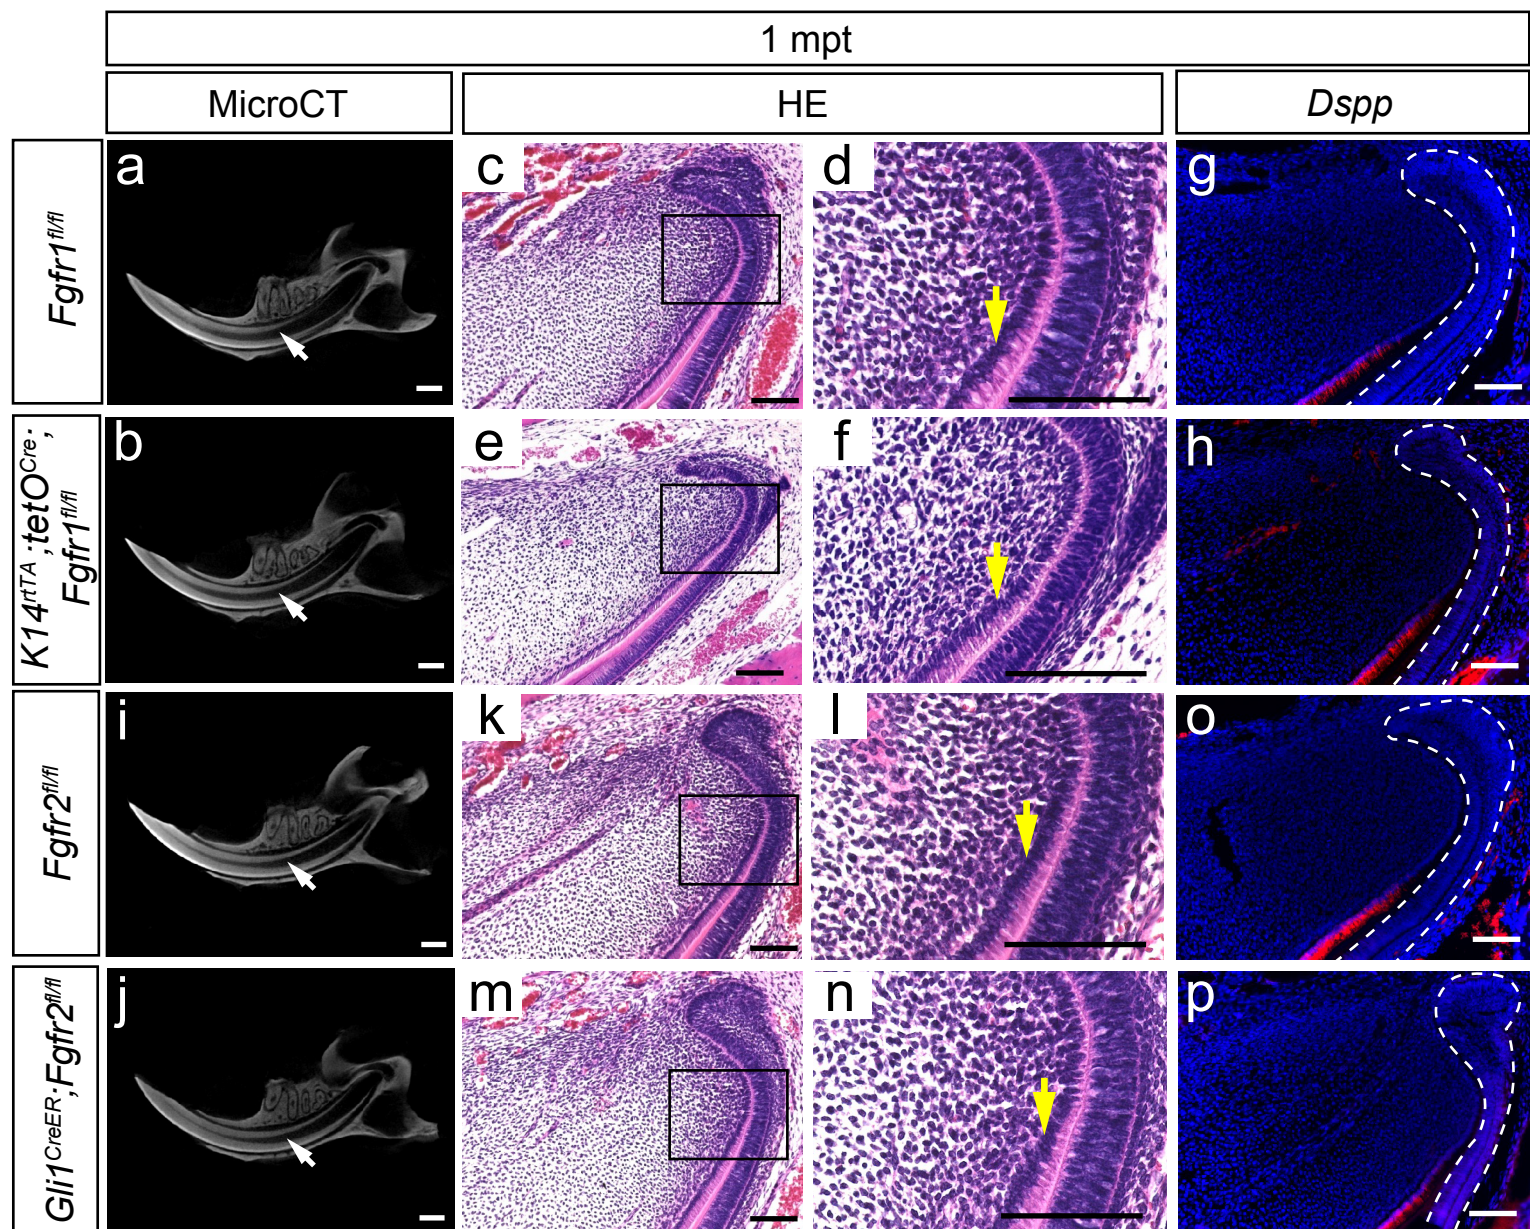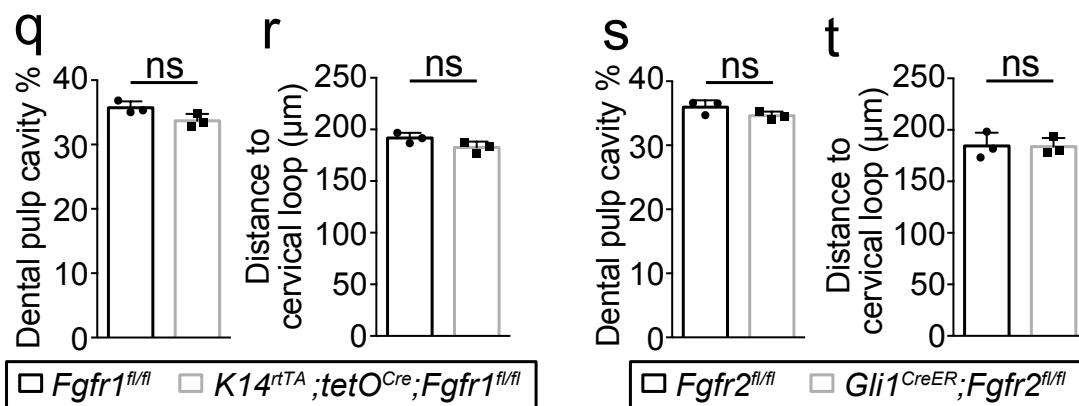

**Supplementary Fig. 5: Neither depletion of FGFR1 in epithelium nor depletion of FGFR2 in MSCs affect mesenchymal homeostasis.**

**a-h** No obvious change in dentin formation is observed when FGFR1 is depleted from the epithelium. **a-b** CT images of control and *K14<sup>rtTA</sup>;tetO<sup>Cre</sup>;Fgfr1<sup>fl/fl</sup>* mice one month after induction. The morphology with histological analysis (**c-f**) and differentiation of odontoblasts (**g-h**) showed no obvious differences between groups. **q** Quantification of dental pulp cavity percentage in control and mutant mice.  $P=0.0712$ . **r** Quantification of distance of *Dspp*<sup>+</sup> cells to cervical loop in control and mutant mice.  $P=0.1044$ .

**i-p** No obvious change in dentin formation is observed when FGFR2 is depleted in MSCs. **i-j** CT images of control and *Gli1<sup>CreER</sup>;Fgfr2<sup>fl/fl</sup>* mice one month after induction. The odontoblast morphology (**k-n**) and differentiation (**o-p**) are unaffected in *Gli1<sup>CreER</sup>;Fgfr2<sup>fl/fl</sup>* mice. **s** Quantification of dental pulp cavity percentage in control and mutant mice.  $P=0.1428$ . **t** Quantification of distance of *Dspp*<sup>+</sup> cells to cervical loop in control and mutant mice.  $P=0.9412$ . White arrow points to dental pulp cavity; yellow arrow points to pre-odontoblast. For **q-t**  $n=3$  and each data point represents one animal, with unpaired Student's t-test performed. All data are expressed as the mean $\pm$ SD. Source data are provided as a Source Data file. \*\* $P<0.01$ , \*\*\*\* $P<0.0001$ . Each experiment was repeated independently three times. White dotted line outlines cervical loop. Scale bars, **a-b** and **i-j** 1mm; others, 100 $\mu$ m.

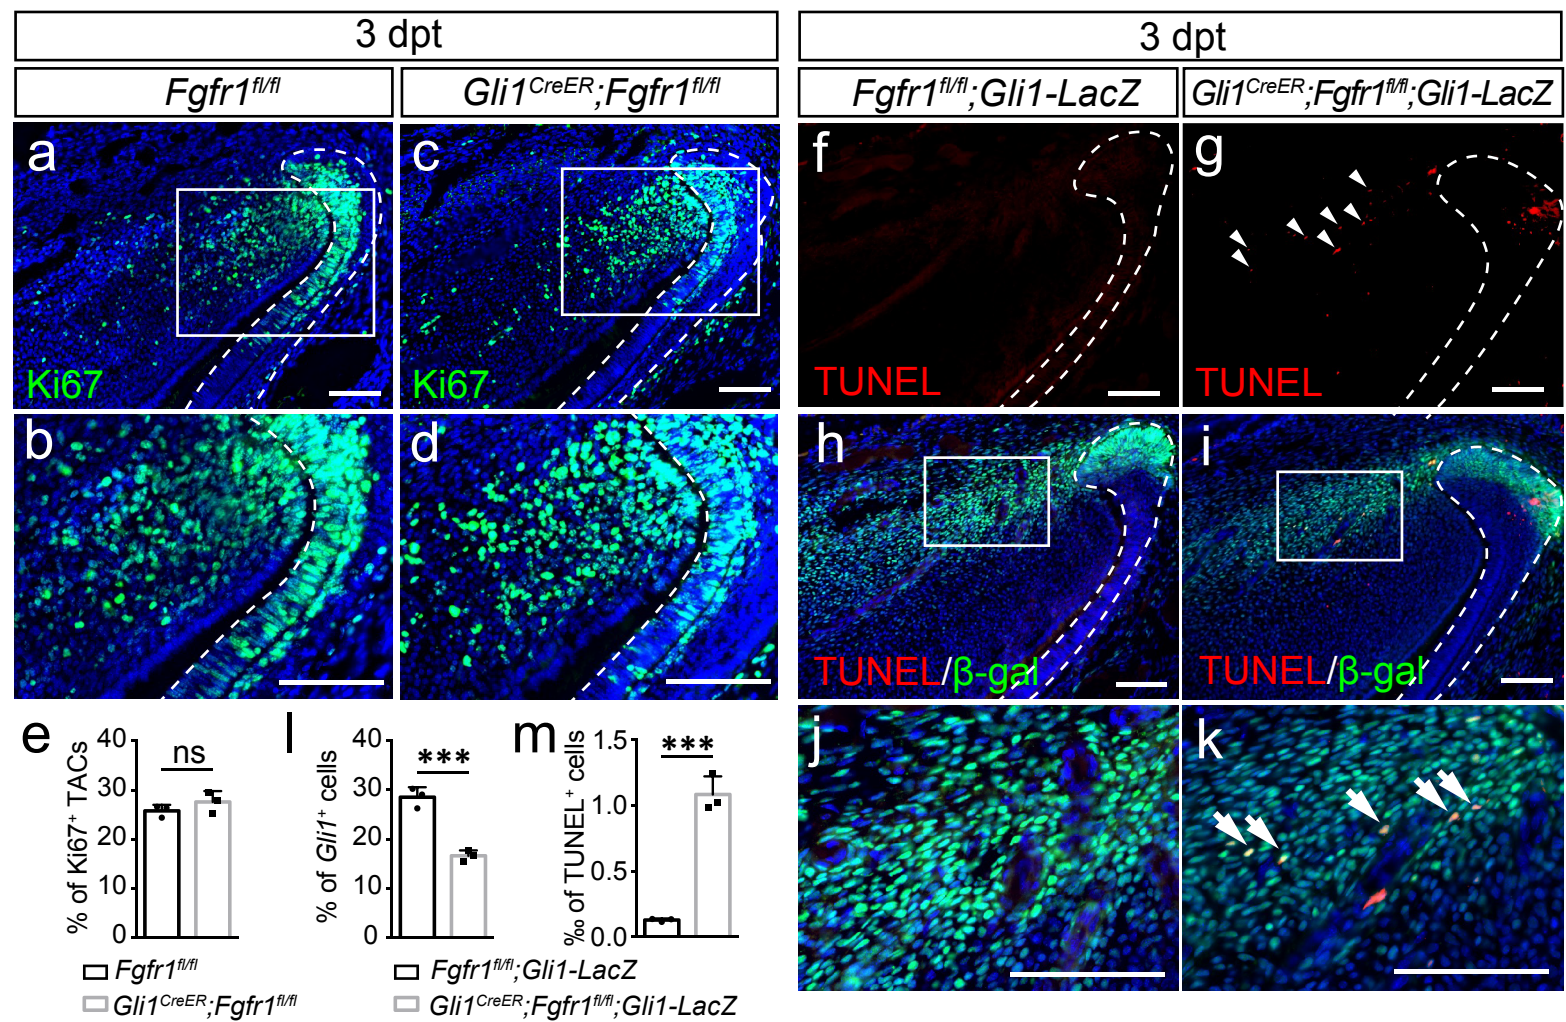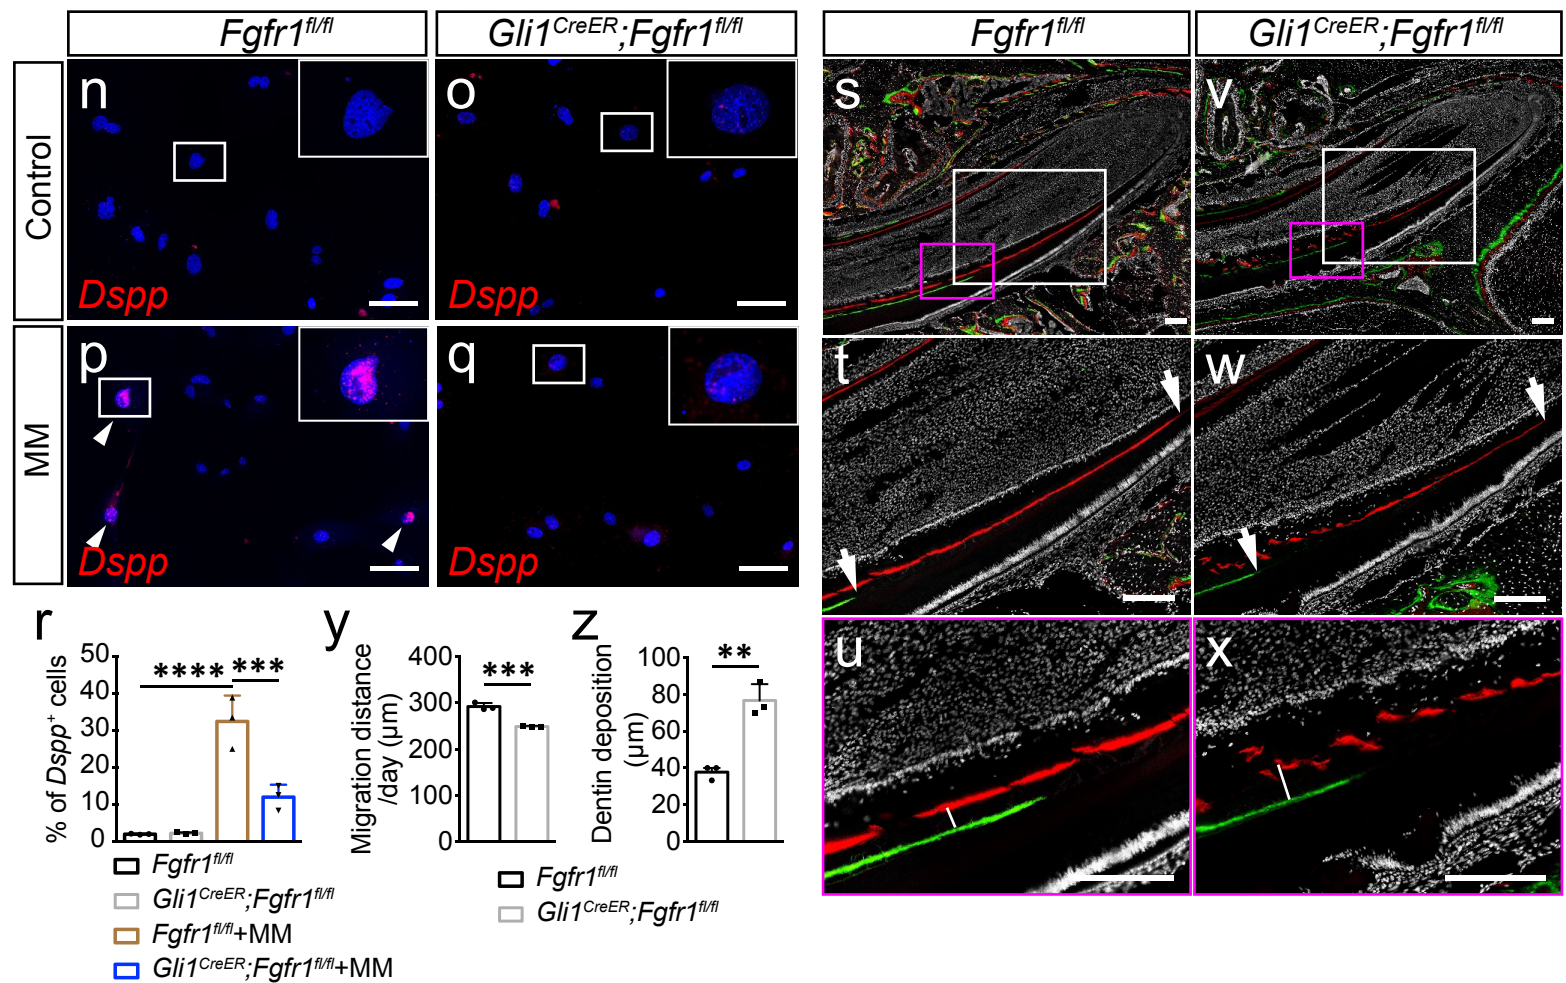

**Supplementary Fig. 6: Loss of FGF signaling in MSCs disturbs mesenchymal tissue homeostasis.**

**a-k** Apoptosis leads to decreased MSCs. **a-d** TACs stained with Ki67 in control and *Gli1<sup>CreER</sup>;Fgfr1<sup>fl/fl</sup>* mice 3 days after induction. **e** Quantification of Ki67<sup>+</sup> TACs in control and mutant mice.  $P=0.2817$ . **f-m** Increased apoptosis in *Gli1*<sup>+</sup> cells in *Gli1<sup>CreER</sup>;Fgfr1<sup>fl/fl</sup>;Gli1-LacZ* mice. **f-g** Apoptosis detected with TUNEL staining in control and *Gli1<sup>CreER</sup>;Fgfr1<sup>fl/fl</sup>;Gli1-LacZ* mice. White arrowheads point to TUNEL<sup>+</sup> cells. **h-k** TUNEL and  $\beta$ -gal staining in control and mutant mice. White arrows point to co-localization of TUNEL<sup>+</sup> cells and *Gli1*<sup>+</sup> cells. **l** Quantification of *Gli1*<sup>+</sup> cells in the mesenchyme.  $P=0.0009$ . **m** Quantification of TUNEL<sup>+</sup> cells in the mesenchyme.  $P=0.0003$ .  $N=3$ , each data point represents one animal, with unpaired Student's t-test performed.

**n-r** Decreased odontoblastic differentiation of MSCs with FGF signaling depletion. Expression of *Dspp* in cells from control and *Gli1<sup>CreER</sup>;Fgfr1<sup>fl/fl</sup>* mice, after culturing for 3 days with medium (**n-o**) or mineralized medium (MM) (**p-q**). White arrowhead points to *Dspp*<sup>+</sup> cells. **r** Quantification of Ki67<sup>+</sup> TACs in control and mutant mice. *Fgfr1<sup>fl/fl</sup>* versus *Gli1<sup>CreER</sup>;Fgfr1<sup>fl/fl</sup>*:  $P<0.0001$ ; *Fgfr1<sup>fl/fl</sup>*+MM versus *Gli1<sup>CreER</sup>;Fgfr1<sup>fl/fl</sup>*+MM:  $P=0.0009$ .  $N=3$  each data point represents one biological replicate, with one-way ANOVA analysis.

**s-z** Decreased migration of odontoblasts with FGF signaling depletion. **s and v** With double labeling by calcein and Alizarin red injection, we can observe the dynamics of dentin formation. **t and w** The length between red and green fluorescence indicates migration of odontoblasts within 5 days. **u and x** The thickness between red and green fluorescence shows the deposition of dentin. White arrows point to the length of odontoblast migration; white lines indicate the thickness of dentin. **y** Quantification of migration distance per day.  $P=0.0007$ . **z and e** Quantification of dentin deposition.  $P=0.0022$ .  $N=3$ , each data point represents one animal, with unpaired Student's t-test performed. All data are expressed as the mean $\pm$ SD. Source data are provided as a Source Data file. \*\* $P<0.01$ , \*\*\*\* $P<0.0001$ . Each experiment was repeated independently three times. White dotted line shows the cervical loop. Scale bars, **s and v** 200 $\mu$ m; others, 100 $\mu$ m.

*Gli1-LacZ*

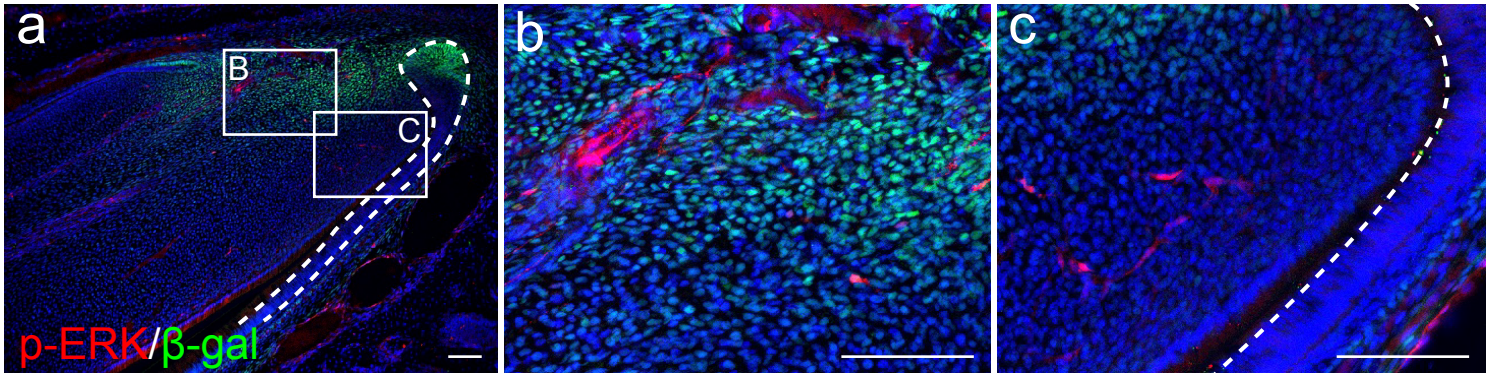

*Fgfr1<sup>fl/fl</sup>*

*Gli1<sup>CreER</sup>;Fgfr1<sup>fl/fl</sup>+Vehicle*

*Gli1<sup>CreER</sup>;Fgfr1<sup>fl/fl</sup>+Rapamycin*

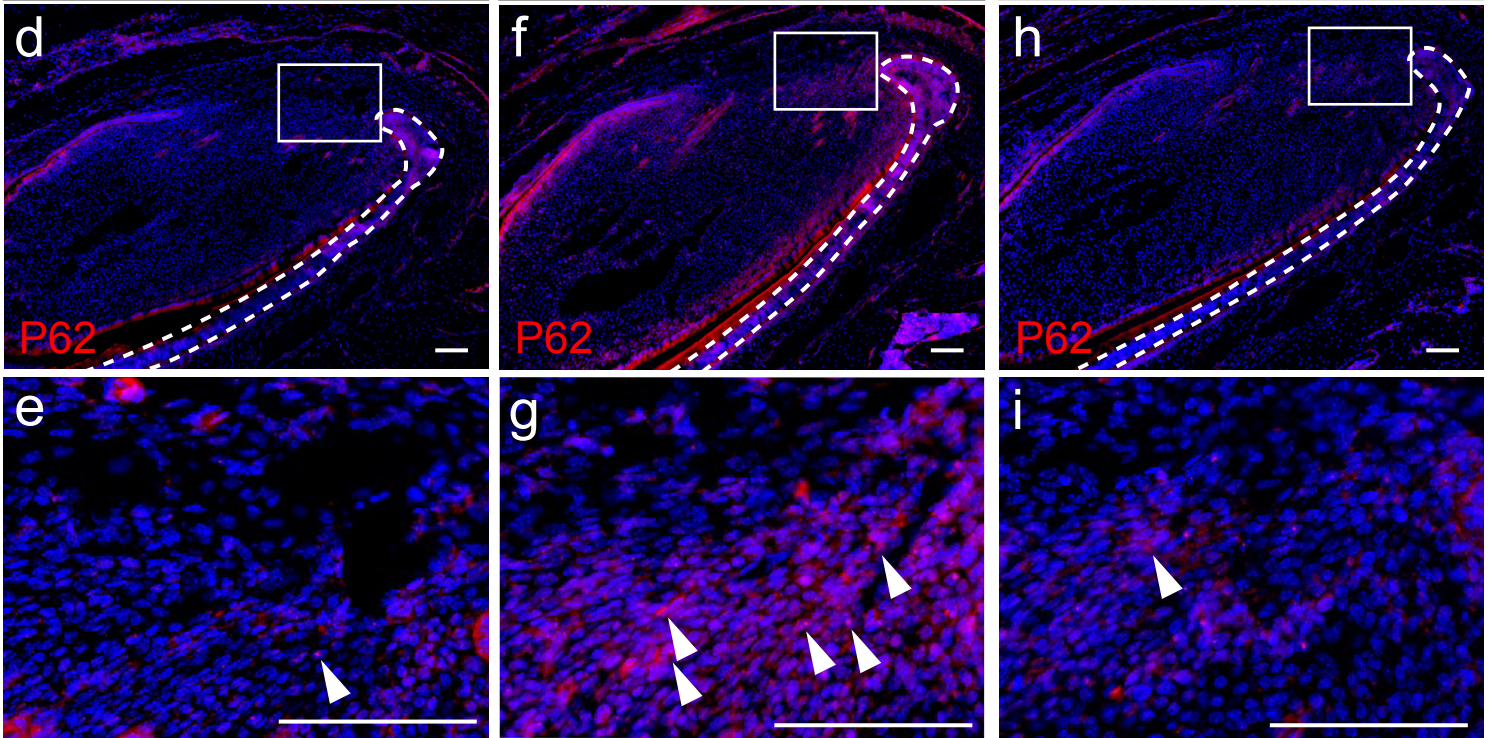

**Supplementary Fig. S7: Autophagy is reactivated in *Gli1<sup>CreER</sup>;Fgfr1<sup>fl/fl</sup>* mice by rapamycin injection.**

**a-c** Expression pattern of p-ERK and  $\beta$ -gal in the incisor of *Gli1-LacZ* mice. **d-i** Expression of autophagy substrate P62 in incisors of control, *Gli1<sup>CreER</sup>;Fgfr1<sup>fl/fl</sup>* mice treated with vehicle and *Gli1<sup>CreER</sup>;Fgfr1<sup>fl/fl</sup>* mice treated with rapamycin. White arrowhead points to P62<sup>+</sup> cells. Scale bars, 100 $\mu$ m.

a

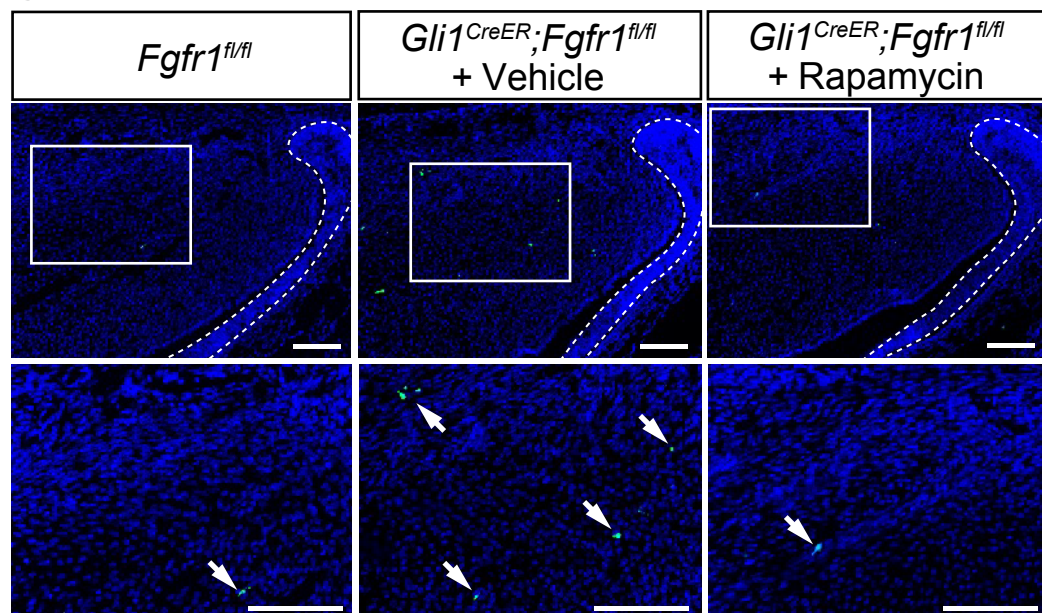

b

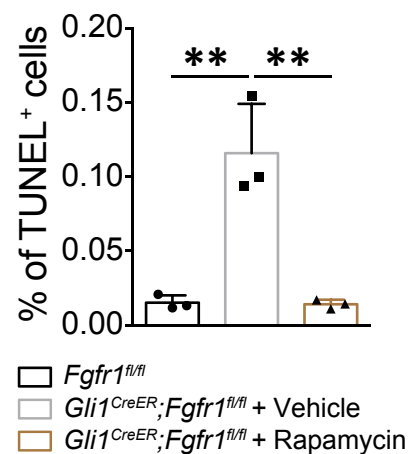

c

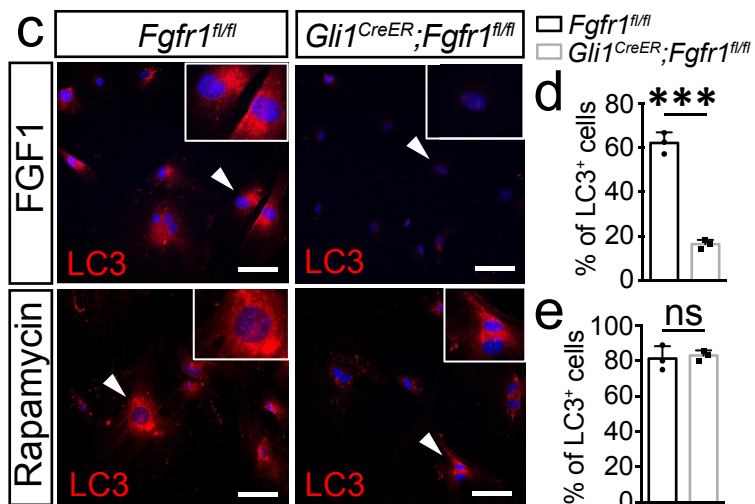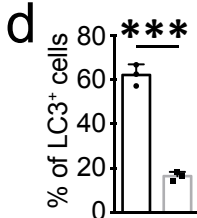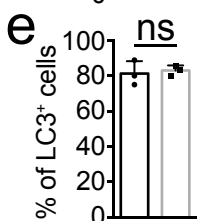

f

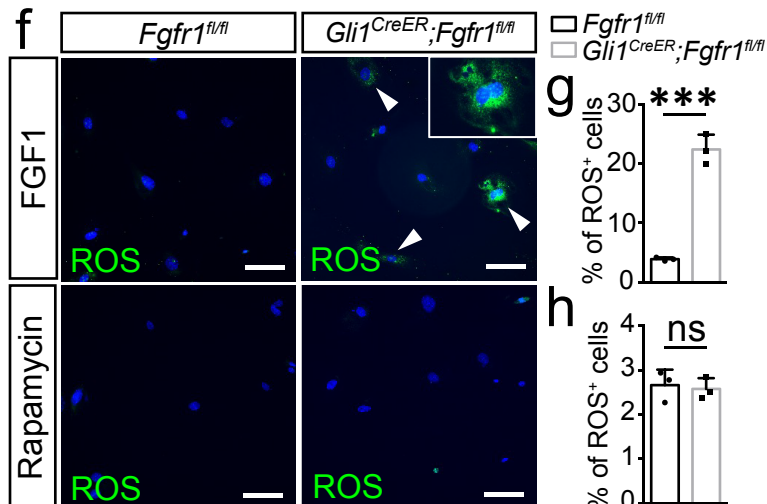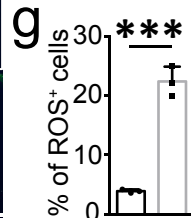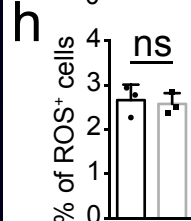

i

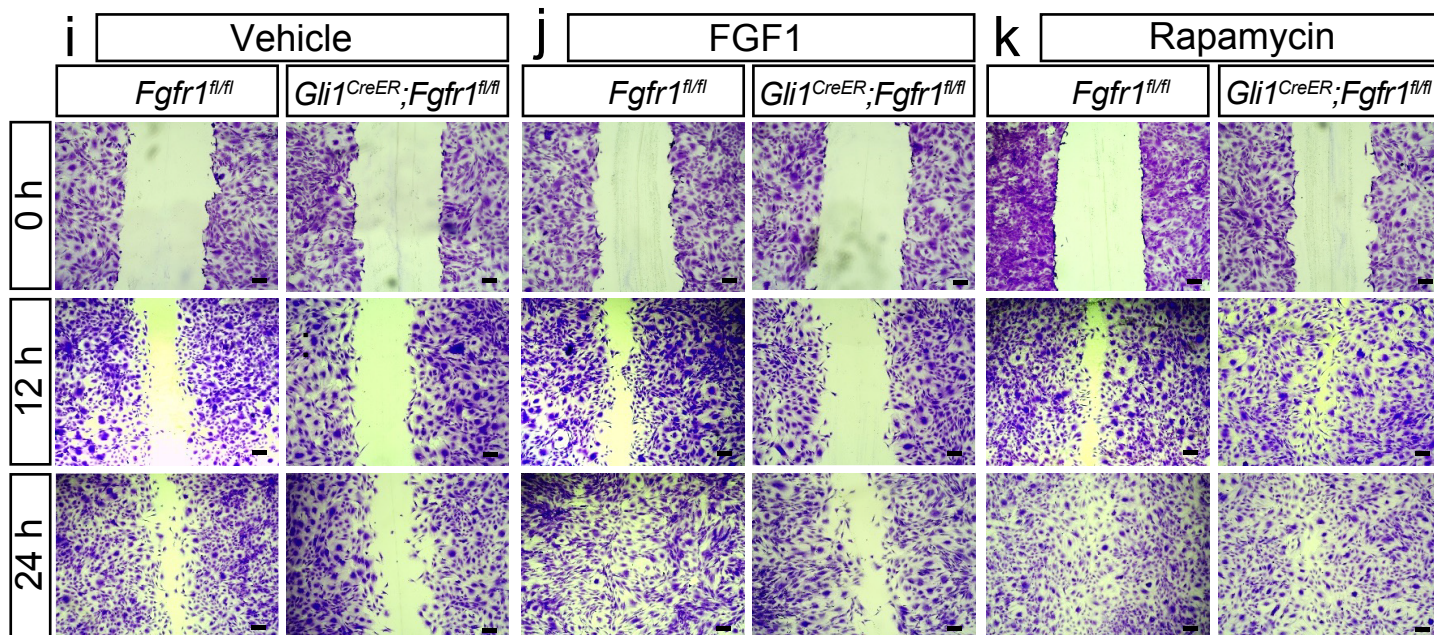

j

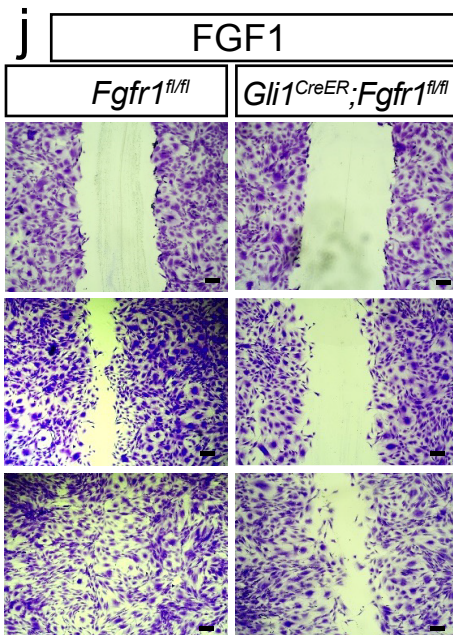

k

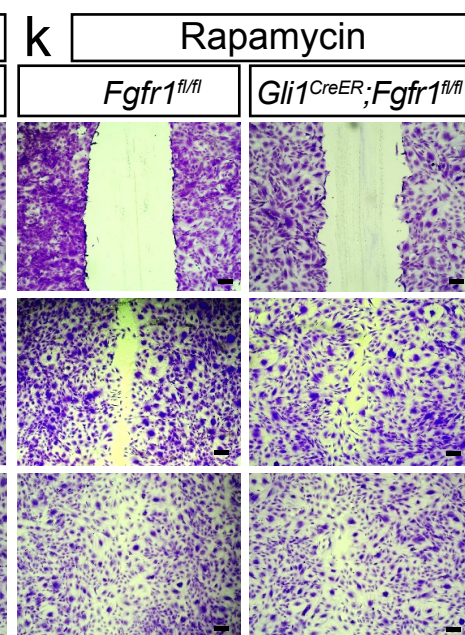

**Supplementary Fig. 8: Activation of autophagy provides resistance to apoptosis and promotes cell migration.**

**a** TUNEL<sup>+</sup> cells in incisors of control, *Gli1<sup>CreER</sup>;Fgfr1<sup>fl/fl</sup>* mice treated with vehicle and *Gli1<sup>CreER</sup>;Fgfr1<sup>fl/fl</sup>* mice treated with rapamycin 3 days after tamoxifen induction. White arrows point to TUNEL<sup>+</sup> cells. **b** Quantification of TUNEL<sup>+</sup> cells in the mesenchyme. Control versus *Gli1<sup>CreER</sup>;Fgfr1<sup>fl/fl</sup>* + Veh: P=0.0018; *Gli1<sup>CreER</sup>;Fgfr1<sup>fl/fl</sup>* + Veh vs *Gli1<sup>CreER</sup>;Fgfr1<sup>fl/fl</sup>* + Rap: P=0.0017. N=3, each data point represents one animal, with one-way ANOVA analysis. **c** Expression of LC3 in MSCs from control and *Gli1<sup>CreER</sup>;Fgfr1<sup>fl/fl</sup>* mice with FGF1 or rapamycin treatment. White arrowheads point to cells in inset. **d** Quantification of LC3<sup>+</sup> cells in control and mutant cells with FGF1 treatment. P=0.0001. **e** Quantification of LC3<sup>+</sup> cells in control and mutant cells with Rapamycin treatment. P=0.7155. **f** Expression of ROS in MSCs from control and *Gli1<sup>CreER</sup>;Fgfr1<sup>fl/fl</sup>* mice with FGF1 or rapamycin treatment. White arrowheads point to ROS<sup>+</sup> cells. **g** Quantification of ROS<sup>+</sup> cells in control and mutant cells with FGF1 treatment. P=0.0002. **h** Quantification of ROS<sup>+</sup> cells in control and mutant cells with Rapamycin treatment. P=0.7427. **i-k** Migration of cells from control and *Gli1<sup>CreER</sup>;Fgfr1<sup>fl/fl</sup>* mice treated with vehicle, FGF1 or rapamycin for 0h, 12h and 24h. For **d**, **e**, **g** and **h**, n=3, each data point represents one biological replicate, with unpaired Student's t-test performed. All data are expressed as the mean±SD. Source data are provided as a Source Data file. \*\*P<0.01, \*\*\*\*P<0.0001. Each experiment was repeated independently three times. White dotted line shows the cervical loop. Scale bars, 100µm.
